# Supplementary material for: Synergic Effect of Selected Ingredients and Calcium Chloride on the Technological, Molecular and Microbial Usefulness of Eggshells and Their Impact on Sensory Properties in a Food Model System
Source: MDPI journal article supplement (doi:10.3390/ijms22042029), 2021-02-18
Supplement: s1 [file s1]

## Supporting materials

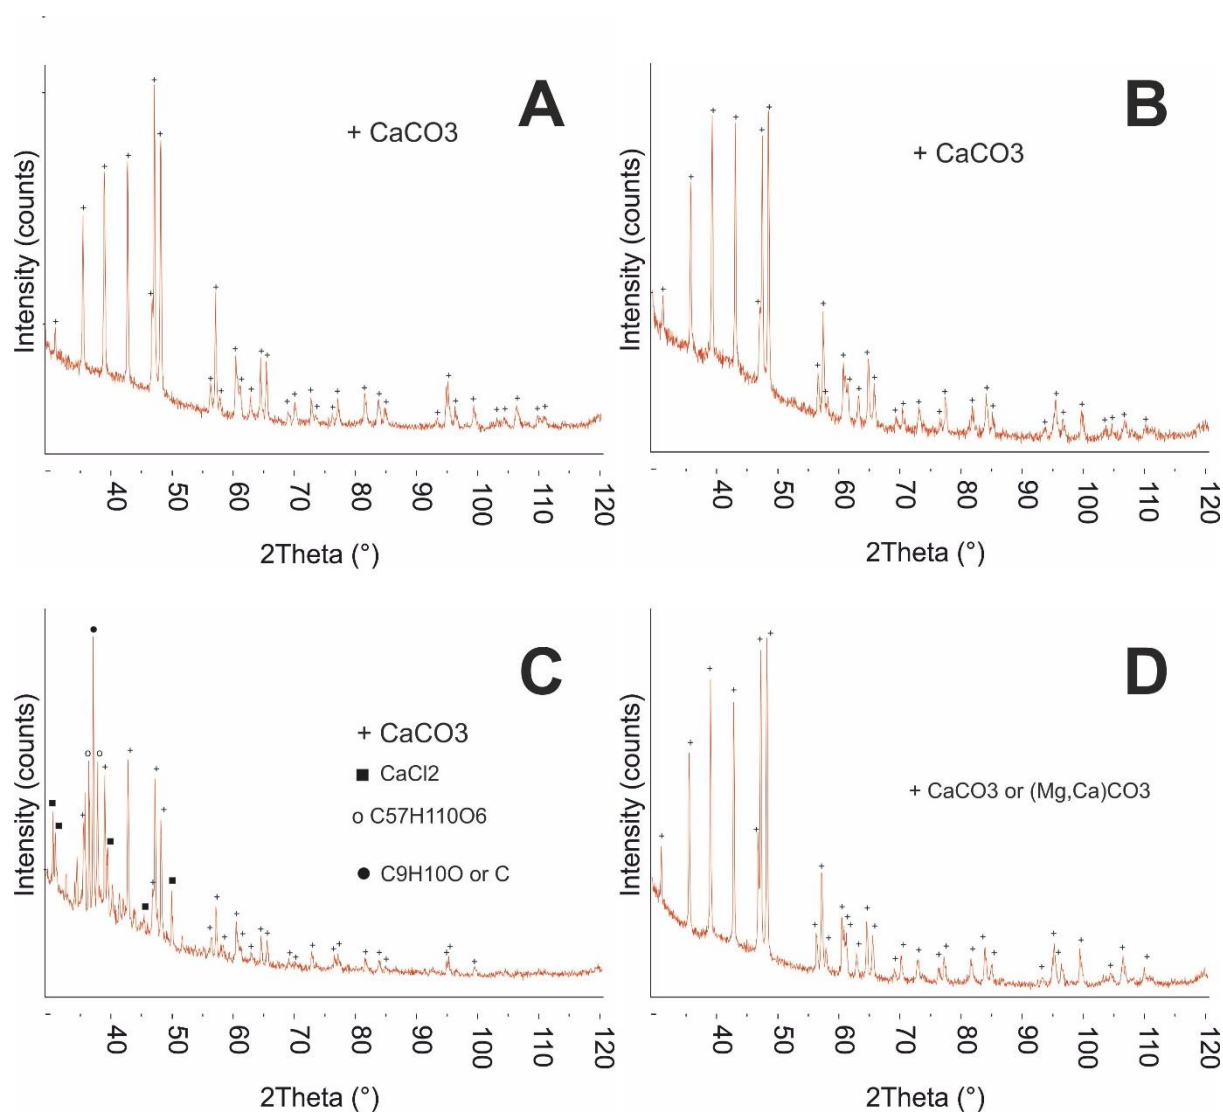

**Figure S1.** XRD diffractograms of studied calcium matrices. A-EGR, B- EHSl, C-ELA, D-ED.
